# Supplementary material for: Alpha-Fetoprotein Promoter-Driven Cre/LoxP-Switched RNA Interference for Hepatocellular Carcinoma Tissue-Specific Target Therapy
Source: PLOS journal article supplement (doi:10.1371/journal.pone.0053072), 2013-02-28
Supplement: S1 (10.1371/journal.pone.0053072.s001) [file journal.pone.0053072.s001]

**The sequence of AFP promoter (540bp)**:

GAATTCGGCCTGAAATAACCTCTGAAAGAGGAACTTGGTTAGGTACCTTCTGAGGCTGAAAGAACCAGCTGTGGAATGTGTGTCAGTTAGGGTGTGGAAAGTCCCCAGGCTCCCCAGCAGGCAGAAGTATGCAAAGCATGCATCTCAATTAGTCAGCAACCAGGTGTGGAAAGTCCCCAGGCTCCCCAGCAGGCAGAAGTATGCAAAGCATGCATCTCAATTAGTCAGCAACCATAGTCCCACTGCAGTTTGAGGAGAATATTTGTTATATTTGCAAAATAAAATAAGTTTGCAAGTTTTTTTTTTCTGCCCCAAAGAGCTCTGTGTCCTTGAACATAAAATACAAATAACCGCTATGCTGTTAATTATTGGCAAATGTCCCATTTTCAACCTAAGGAAATACCATAAAGTAACAGATATACCAACAAAAGGTTACTAGTTAACAGGCATTGCCTGAAAAGAGTATAAAAGAATTTCAGCATGATTTTCCATATTGTGCTTCCACCACTGCCAATAACACGCTAGC

Note: GAATTC and GCTAGC are NheI and EcoRI restriction enzyme cutting site, respectively.
